# Supplementary material for: Dietary Intake and Supplement Use Among Saudi Residents during COVID-19 Lockdown
Source: MDPI journal article supplement (doi:10.3390/ijerph18126435), 2021-06-14
Supplement: s1 [file s1]

**Table S1.** Percentage of supplement use in Gender and COVID-19 Patients and family members.

| Parameters   | Overall    |             | Covid 19 Patients and Family members |            |            |          |
|--------------|------------|-------------|--------------------------------------|------------|------------|----------|
|              | Male       | Female      | P-values                             | Male       | Female     | P-values |
| Multivitamin |            |             |                                      |            |            |          |
| No           | 682 (74.0) | 793 (76.0)  | 0.329                                | 10 (52.6)  | 15 (57.7)  | 0.736    |
| Yes          | 239 (26.0) | 251 (24.0)  |                                      | 9 (47.4)   | 11 (42.3)  |          |
| Vitamin D    |            |             |                                      |            |            |          |
| No           | 723 (78.5) | 838 (80.3)  | 0.334                                | 17 (89.5)  | 19 (73.1)  | 0.264    |
| Yes          | 198 (21.5) | 206 (19.7)  |                                      | 2 (10.5)   | 7 (26.9)   |          |
| Selenium     |            |             |                                      |            |            |          |
| No           | 915 (99.3) | 1041 (99.7) | 0.320                                | 19 (100.0) | 26 (100.0) | NA       |
| Yes          | 6 (0.7)    | 3 (0.3)     |                                      | 0 (0.0)    | 0 (0.0)    |          |
| Vitamin C    |            |             |                                      |            |            |          |
| No           | 806 (87.5) | 913 (87.5)  | 1.000                                | 17 (89.5)  | 21 (80.8)  | 0.681    |
| Yes          | 115 (12.5) | 131 (12.5)  |                                      | 2 (10.5)   | 5 (19.2)   |          |
| Zinc         |            |             |                                      |            |            |          |
| No           | 908 (98.6) | 1030 (98.7) | 1.000                                | 18 (94.7)  | 25 (96.2)  | 1.000    |
| Yes          | 13 (1.4)   | 14 (1.3)    |                                      | 1 (5.3)    | 1 (3.8)    |          |

Note: Data presented as N(%). P-values are obtained from chi-square test.

**Table S2.** Percentage of supplement use according to COVID-19 status.

| Parameter    | Are you or Your family member<br>was diagnosed with COVID-19? |            |          | No COVID-19 |             | P-values | COVID-19 Patients and family members |            |          |
|--------------|---------------------------------------------------------------|------------|----------|-------------|-------------|----------|--------------------------------------|------------|----------|
|              | NO                                                            | Yes        | P-values | Male        | Female      |          | Male                                 | Female     | P-values |
| Multivitamin |                                                               |            |          |             |             |          |                                      |            |          |
| No           | 1450 (75.5)                                                   | 25 (55.6)  | 0.003    | 672 (74.5)  | 778 (76.4)  | 0.328    | 10 (52.6)                            | 15 (57.7)  | 0.736    |
| Yes          | 470 (24.5)                                                    | 20 (44.4)  |          | 230 (25.5)  | 240 (23.6)  |          | 9 (47.4)                             | 11 (42.3)  |          |
| Vitamin D    |                                                               |            |          |             |             |          |                                      |            |          |
| No           | 1525 (79.4)                                                   | 36 (80.0)  | 0.551    | 706 (78.3)  | 819 (80.5)  | 0.238    | 17 (89.5)                            | 19 (73.1)  | 0.264    |
| Yes          | 395 (20.6)                                                    | 9 (20.0)   |          | 196 (21.7)  | 199 (19.5)  |          | 2 (10.5)                             | 7 (26.9)   |          |
| Selenium     |                                                               |            |          |             |             |          |                                      |            |          |
| No           | 1911 (99.5)                                                   | 45 (100.0) | 1.000    | 896 (99.3)  | 1015 (99.7) | 0.320    | 19 (100.0)                           | 26 (100.0) | NA       |
| Yes          | 9 (0.5)                                                       | 0 (0.0)    |          | 6 (0.7)     | 3 (0.3)     |          | 0 (0.0)                              | 0 (0.0)    |          |
| Vitamin C    |                                                               |            |          |             |             |          |                                      |            |          |
| No           | 1681 (87.6)                                                   | 38 (84.4)  | 0.533    | 789 (87.5)  | 892 (87.6)  | 0.921    | 17 (89.5)                            | 21 (80.8)  | 0.681    |
| Yes          | 239 (12.4)                                                    | 7 (15.6)   |          | 113 (12.5)  | 126 (12.4)  |          | 2 (10.5)                             | 5 (19.2)   |          |
| Zinc         |                                                               |            |          |             |             |          |                                      |            |          |
| No           | 1895 (98.7)                                                   | 43 (95.6)  | 0.126    | 890 (98.7)  | 1005 (98.7) | 0.918    | 18 (94.7)                            | 25 (96.2)  | 1.000    |
| Yes          | 25 (1.3)                                                      | 2 (4.4)    |          | 12 (1.3)    | 13 (1.3)    |          | 1 (5.3)                              | 1 (3.8)    |          |

Note: Data presented as N(%). P-values are obtained from chi-square test.

**Table S3.** Gender distribution among participants for Supplementation use according to Education, Income, and Age.

| Education    |             |             |         |            |             |         |             |            |         |             |             |         |
|--------------|-------------|-------------|---------|------------|-------------|---------|-------------|------------|---------|-------------|-------------|---------|
| Parameters   | High School |             |         | Bachelor   |             |         | Master      |            |         | PHD         |             |         |
|              | Male        | Female      | P-value | Male       | Female      | P-value | Male        | Female     | P-value | Male        | Female      | P-value |
| Multivitamin |             |             |         |            |             |         |             |            |         |             |             |         |
| No           | 52 (71.2)   | 71 (82.6)   | 0.089   | 408 (75.4) | 452 (77.4)  | 0.434   | 110 (70.1)  | 151 (73.3) | 0.497   | 102 (77.9)  | 104 (73.2)  | 0.375   |
| Yes          | 21 (28.8)   | 15 (17.4)   |         | 133 (24.6) | 132 (22.6)  |         | 47 (29.9)   | 55 (26.7)  |         | 29 (22.1)   | 38 (26.8)   |         |
| Vitamin D    |             |             |         |            |             |         |             |            |         |             |             |         |
| No           | 59 (80.8)   | 70 (81.4)   | 0.927   | 426 (78.7) | 484 (82.9)  | 0.078   | 123 (78.3)  | 163 (79.1) | 0.857   | 98 (74.8)   | 102 (71.8)  | 0.579   |
| Yes          | 14 (19.2)   | 16 (18.6)   |         | 115 (21.3) | 100 (17.1)  |         | 34 (21.7)   | 43 (20.9)  |         | 33 (25.2)   | 40 (28.2)   |         |
| Selenium     |             |             |         |            |             |         |             |            |         |             |             |         |
| No           | 71 (97.3)   | 85 (98.8)   | 0.594   | 537 (99.3) | 583 (99.8)  | 0.201   | 157 (100.0) | 205 (99.5) | 1.000   | 131 (100.0) | 142 (100.0) | NA      |
| Yes          | 2 (2.7)     | 1 (1.2)     |         | 4 (0.7)    | 1 (0.2)     |         | 0 (0.0)     | 1 (0.5)    |         | 0 (0.0)     | 0 (0.0)     |         |
| Vitamin C    |             |             |         |            |             |         |             |            |         |             |             |         |
| No           | 62 (84.9)   | 70 (81.4)   | 0.554   | 475 (87.8) | 513 (87.8)  | 0.983   | 136 (86.6)  | 181 (87.9) | 0.725   | 116 (88.5)  | 128 (90.1)  | 0.67    |
| Yes          | 11 (15.1)   | 16 (18.6)   |         | 66 (12.2)  | 71 (12.2)   |         | 21 (13.4)   | 25 (12.1)  |         | 15 (11.5)   | 14 (9.9)    |         |
| Zinc         |             |             |         |            |             |         |             |            |         |             |             |         |
| No           | 72 (98.6)   | 85 (98.8)   | 1.000   | 534 (98.7) | 577 (98.8)  | 0.885   | 157 (100.0) | 204 (99.0) | 0.508   | 127 (96.9)  | 139 (97.9)  | 0.714   |
| Yes          | 1 (1.4)     | 1 (1.2)     |         | 7 (1.3)    | 7 (1.2)     |         | 0 (0.0)     | 2 (1.0)    |         | 4 (3.1)     | 3 (2.1)     |         |
| Income       |             |             |         |            |             |         |             |            |         |             |             |         |
| Parameters   | <5000       |             |         | 5000-7000  |             |         | 8000-16000  |            |         | >16000      |             |         |
|              | Male        | Female      | P-value | Male       | Female      | P-value | Male        | Female     | P-value | Male        | Female      | P-value |
| Multivitamin |             |             |         |            |             |         |             |            |         |             |             |         |
| No           | 250 (75.3)  | 273 (79.6)  | 0.182   | 68 (74.7)  | 76 (72.4)   | 0.711   | 182 (72.8)  | 233 (75.2) | 0.526   | 172 (75.1)  | 196 (75.4)  | 0.944   |
| Yes          | 82 (24.7)   | 70 (20.4)   |         | 23 (25.3)  | 29 (27.6)   |         | 68 (27.2)   | 77 (24.8)  |         | 57 (24.9)   | 64 (24.6)   |         |
| Vitamin D    |             |             |         |            |             |         |             |            |         |             |             |         |
| No           | 265 (79.8)  | 282 (82.2)  | 0.427   | 69 (75.8)  | 79 (75.2)   | 0.924   | 197 (78.8)  | 248 (80.0) | 0.727   | 175 (76.4)  | 210 (80.8)  | 0.241   |
| Yes          | 67 (20.2)   | 61 (17.8)   |         | 22 (24.2)  | 26 (24.8)   |         | 53 (21.2)   | 62 (20.0)  |         | 54 (23.6)   | 50 (19.2)   |         |
| Selenium     |             |             |         |            |             |         |             |            |         |             |             |         |
| No           | 330 (99.4)  | 343 (100.0) | 0.242   | 91 (100.0) | 103 (98.1)  | 0.500   | 246 (98.4)  | 309 (99.7) | 0.178   | 229 (100.0) | 260 (100.0) | NA      |
| Yes          | 2 (0.6)     | 0 (0.0)     |         | 0 (0.0)    | 2 (1.9)     |         | 4 (1.6)     | 1 (0.3)    |         | 0 (0.0)     | 0 (0.0)     |         |
| Vitamin C    |             |             |         |            |             |         |             |            |         |             |             |         |
| No           | 298 (89.8)  | 305 (88.9)  | 0.724   | 77 (84.6)  | 83 (79.0)   | 0.315   | 211 (84.4)  | 266 (85.8) | 0.641   | 203 (88.6)  | 238 (91.5)  | 0.283   |
| Yes          | 34 (10.2)   | 38 (11.1)   |         | 14 (15.4)  | 22 (21.0)   |         | 39 (15.6)   | 44 (14.2)  |         | 26 (11.4)   | 22 (8.5)    |         |
| Zinc         |             |             |         |            |             |         |             |            |         |             |             |         |
| No           | 328 (98.8)  | 337 (98.3)  | 0.752   | 90 (98.9)  | 105 (100.0) | 0.464   | 247 (98.8)  | 306 (98.7) | 1.000   | 225 (98.3)  | 257 (98.8)  | 0.711   |

|              |             |             |         |             |            |         |             |             |         |             |            |         |
|--------------|-------------|-------------|---------|-------------|------------|---------|-------------|-------------|---------|-------------|------------|---------|
| Yes          | 4 (1.2)     | 6 (1.7)     |         | 1 (1.1)     | 0 (0.0)    |         | 3 (1.2)     | 4 (1.3)     |         | 4 (1.7)     | 3 (1.2)    |         |
| Age          |             |             |         |             |            |         |             |             |         |             |            |         |
| Parameters   | 15-25 years |             |         | 26-35 years |            |         | 36-45 years |             |         | >45 years   |            |         |
|              | Male        | Female      | P-value | Male        | Female     | P-value | Male        | Female      | P-value | Male        | Female     | P-value |
| Multivitamin |             |             |         |             |            |         |             |             |         |             |            |         |
| No           | 224 (78.9)  | 254 (82.5)  | 0.268   | 160 (69.9)  | 216 (77.4) | 0.054   | 136 (76.0)  | 156 (71.9)  | 0.358   | 152 (72.4)  | 152 (71.0) | 0.757   |
| Yes          | 60 (21.1)   | 54 (17.5)   |         | 69 (30.1)   | 63 (22.6)  |         | 43 (24.0)   | 61 (28.1)   |         | 58 (27.6)   | 62 (29.0)  |         |
| Vitamin D    |             |             |         |             |            |         |             |             |         |             |            |         |
| No           | 231 (81.3)  | 256 (83.1)  | 0.571   | 176 (76.9)  | 223 (79.9) | 0.401   | 142 (79.3)  | 169 (77.9)  | 0.727   | 157 (74.8)  | 171 (79.9) | 0.206   |
| Yes          | 53 (18.7)   | 52 (16.9)   |         | 53 (23.1)   | 56 (20.1)  |         | 37 (20.7)   | 48 (22.1)   |         | 53 (25.2)   | 43 (20.1)  |         |
| Selenium     |             |             |         |             |            |         |             |             |         |             |            |         |
| No           | 283 (99.6)  | 308 (100.0) | 0.480   | 227 (99.1)  | 277 (99.3) | 1.000   | 176 (98.3)  | 217 (100.0) | 0.092   | 210 (100.0) | 213 (99.5) | 1.000   |
| Yes          | 1 (0.4)     | 0 (0.0)     |         | 2 (0.9)     | 2 (0.7)    |         | 3 (1.7)     | 0 (0.0)     |         | 0 (0.0)     | 1 (0.5)    |         |
| Vitamin C    |             |             |         |             |            |         |             |             |         |             |            |         |
| No           | 252 (88.7)  | 283 (91.9)  | 0.194   | 198 (86.5)  | 236 (84.6) | 0.551   | 153 (85.5)  | 189 (87.1)  | 0.64    | 186 (88.6)  | 184 (86.0) | 0.424   |
| Yes          | 32 (11.3)   | 25 (8.1)    |         | 31 (13.5)   | 43 (15.4)  |         | 26 (14.5)   | 28 (12.9)   |         | 24 (11.4)   | 30 (14.0)  |         |
| Zinc         |             |             |         |             |            |         |             |             |         |             |            |         |
| No           | 280 (98.6)  | 303 (98.4)  | 1.000   | 228 (99.6)  | 276 (98.9) | 0.631   | 176 (98.3)  | 213 (98.2)  | 1.000   | 206 (98.1)  | 213 (99.5) | 0.212   |
| Yes          | 4 (1.4)     | 5 (1.6)     |         | 1 (0.4)     | 3 (1.1)    |         | 3 (1.7)     | 4 (1.8)     |         | 4 (1.9)     | 1 (0.5)    |         |

Note: Data presented as N(%) . P-values are obtained from chi-square test.

**Table S4.** Dietary Supplement use based on nationality and gender.

| Parameters   | Saudi      |            |         | Non-Saudi  |            |         |
|--------------|------------|------------|---------|------------|------------|---------|
|              | Male       | Female     | P-value | Male       | Female     | P-value |
| Multivitamin |            |            |         |            |            |         |
| No           | 568 (74.4) | 627 (75.3) | 0.704   | 104 (74.8) | 151 (81.6) | 0.139   |
| Yes          | 195 (25.6) | 206 (24.7) |         | 35 (25.2)  | 34 (18.4)  |         |
| Vitamin D    |            |            |         |            |            |         |
| No           | 600 (78.6) | 668 (80.2) | 0.442   | 106 (76.3) | 151 (81.6) | 0.238   |
| Yes          | 163 (21.4) | 165 (19.8) |         | 33 (23.7)  | 34 (18.4)  |         |
| Selenium     |            |            |         |            |            |         |
| No           | 760 (99.6) | 831 (99.8) | 0.675   | 136 (97.8) | 184 (99.5) | 0.318   |
| Yes          | 3 (0.4)    | 2 (0.2)    |         | 3 (2.2)    | 1 (0.5)    |         |
| Vitamin C    |            |            |         |            |            |         |
| No           | 671 (87.9) | 731 (87.8) | 0.909   | 118 (84.9) | 161 (87.0) | 0.582   |
| Yes          | 92 (12.1)  | 102 (12.2) |         | 21 (15.1)  | 24 (13.0)  |         |
| Zinc         |            |            |         |            |            |         |
| No           | 754 (98.8) | 821 (98.6) | 0.648   | 136 (97.8) | 184 (99.5) | 0.318   |
| Yes          | 9 (1.2)    | 12 (1.4)   |         | 3 (2.2)    | 1 (0.5)    |         |

Note: Data presented as N(%); (%). P-values are obtained from chi-square test.
